# Supplementary material
Source: PubMed Central journal article supplement (PMC7048616)

**Table 1.** qPCR primers

| Gene               | Forward primer (5'→3') | Reverse primer (5'→3') |
|--------------------|------------------------|------------------------|
| Rpl32              | AAGCGAAACTGGCGGAAAC    | TAACCGATGTTGGGCATCAG   |
| Muc1               | TACCCTACCTACCACACTCACG | CTGCTACTGCCATTACCTGC   |
| Muc3               | CTTCCAGCCTTCCCTAAACC   | TCCACAGATCCATGCAAAAC   |
| Muc5ac             | ATCTTTCAGGACCCCTGCTC   | ATGGACCACTGGCGTTAGTC   |
| Muc13              | CAACTCAGCCTTCTGGTGGT   | TACAGGGGTTAGGGTTGCAG   |
| Muc20              | CAACATCTGCATCCACTGCT   | GTCAGCCGTACAAGGAGGAA   |
| UNI 16S            | ACTCCTACGGGAGGCAGCAGT  | ATTACCGCGGCTGCTGGC     |
| <i>F. PB1 16S</i>  | CCGGGAATACGCTCTGGAAA   | GCCAACCAACTAATGCACCG   |
| <i>H. biformis</i> | GCTAAGGCCATGAACATGGA   | GCCGTCTCTTCTGTTCTC     |
| <i>L. lactis</i>   | GCCGTCCTCTTCTGTTCTC    | CATTGTGGTTCACCGTTC     |

**Table 2.** Colitis histological scoring system

| Colitis grade | Description                                                                                                                                                                                                                                                          |
|---------------|----------------------------------------------------------------------------------------------------------------------------------------------------------------------------------------------------------------------------------------------------------------------|
| 0             | Normal colonic mucosa                                                                                                                                                                                                                                                |
| 1             | Minimal inflammation restricted to the mucosa and only slightly expanding the lamina propria among crypts or between crypts and <i>muscularis mucosae</i> .                                                                                                          |
| 2             | Mild to moderate (usually focal) inflammation in the mucosa with shortening of the crypts and occasionally mildly extending to the submucosa (usually associated with small ulcers)                                                                                  |
| 3             | Moderate to severe (multifocal to diffuse) inflammation involving the mucosa with shortening or loss of the crypts and moderately to markedly extending into the submucosa and occasionally into the <i>tunica muscularis</i> (usually associated with large ulcers) |
| 4             | Severe transmural inflammation involving the mucosa, submucosa, <i>tunica muscularis</i> , and subserosa (usually associated with diffuse ulceration).                                                                                                               |

**Table 3.** FACS antibodies

| Antigen                 | Fluorophore    | Clone      | Cat.number | Supplier       | Dilution |
|-------------------------|----------------|------------|------------|----------------|----------|
| CD16/32                 | unconjugated   | 93         | 14-0161-82 | Ebiosciences   | 1:50     |
| CD45.2                  | V450           | 104        | 560697     | BD biosciences | 1:200    |
| CD3                     | PE-Cy7         | 145-2C11   | 552774     | BD biosciences | 1:200    |
| CD4                     | FITC           | RM4-5      | 553047     | BD biosciences | 1:200    |
| CD25                    | APC-Cy7        | PC61       | 102026     | Biologend      | 1:200    |
| FoxP3                   | PE             | FJK-16s    | 12-5773-82 | Ebiosciences   | 1:100    |
| Helios                  | Alexa-fluor647 | 22F6       | 51-9883-82 | Ebiosciences   | 1:100    |
| IL17                    | PE             | TC11-18H10 | 559502     | BD biosciences | 1:100    |
| IFN $\gamma$            | APC            | XMG1.2     | 554413     | BD biosciences | 1:100    |
| Ly6G                    | APC            | 1A8        | 560599     | BD biosciences | 1:200    |
| Ly6G                    | APC-Cy7        | 1A8        | 127624     | Biologend      | 1:200    |
| Ly6C                    | FITC           | AL-21      | 553104     | BD biosciences | 1:200    |
| F4/80                   | APC            | BM8        | 17-4801-82 | Ebiosciences   | 1:200    |
| CD11b                   | PerCP- Cy5.5   | M1/70      | 550993     | BD Biosciences | 1:200    |
| CD11c                   | BV650          | N418       | 117339     | Biologend      | 1:200    |
| Fixable viability stain | 510            | -          | 564406     | BD Biosciences | 1:1000   |

# Flow Cytometry. Gating strategy

Fig. 3a - Extended data Fig. 3a-d-e

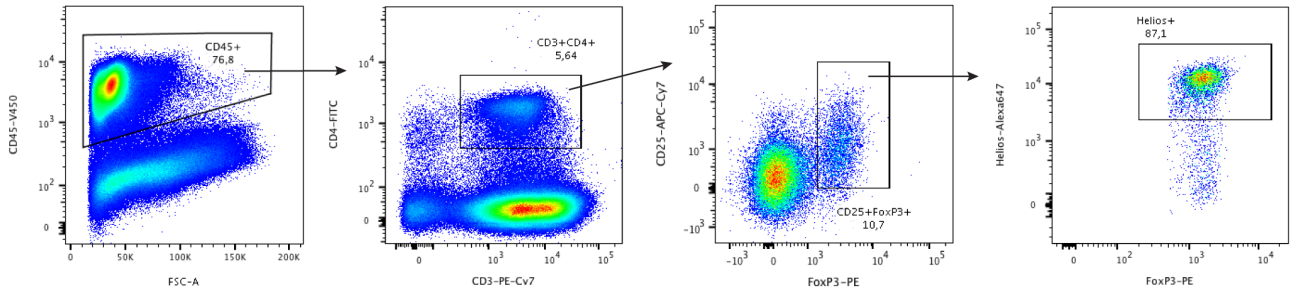

Fig. 3a - Extended data Fig. 3b-c-d-e

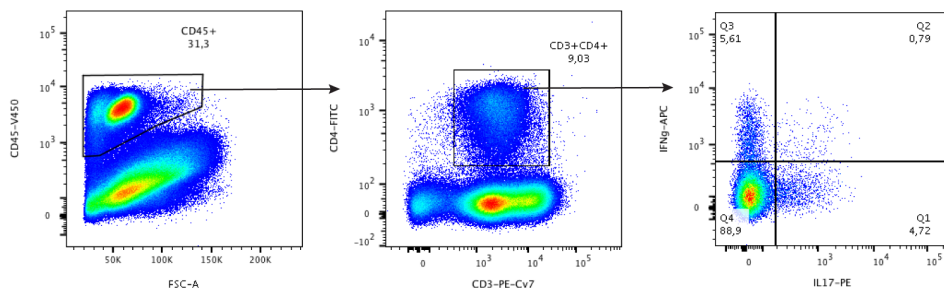

Extended data Fig. 3f-g

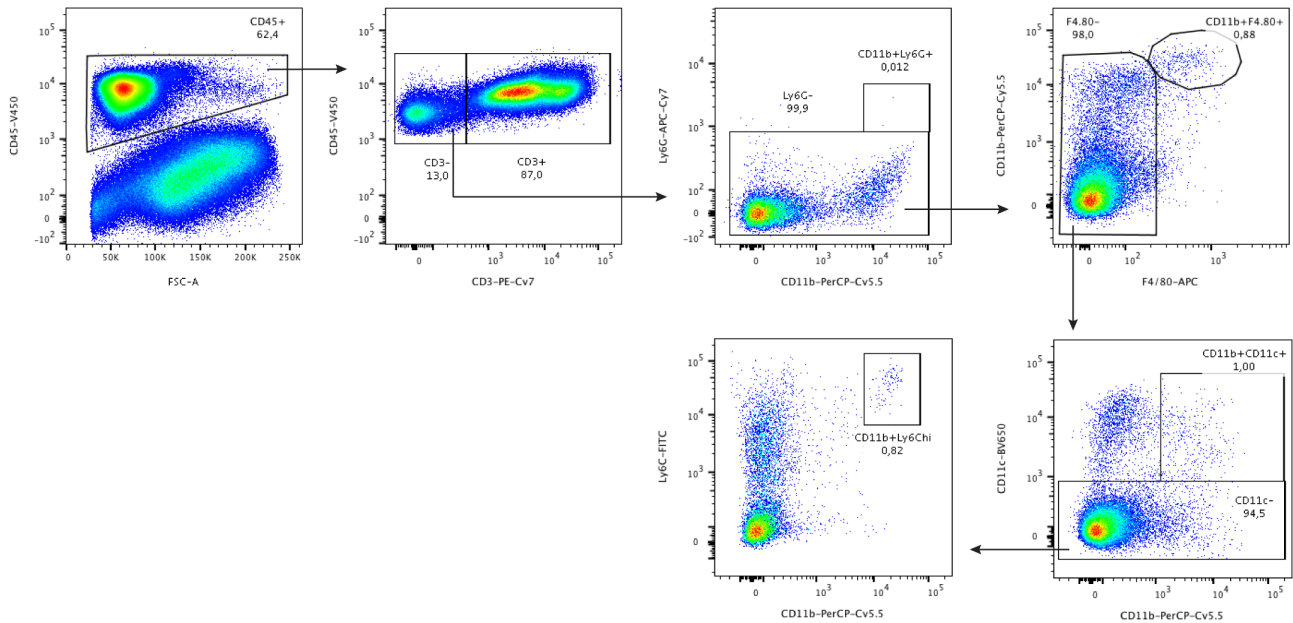

Fig. 3b - Extended data Fig. 3h

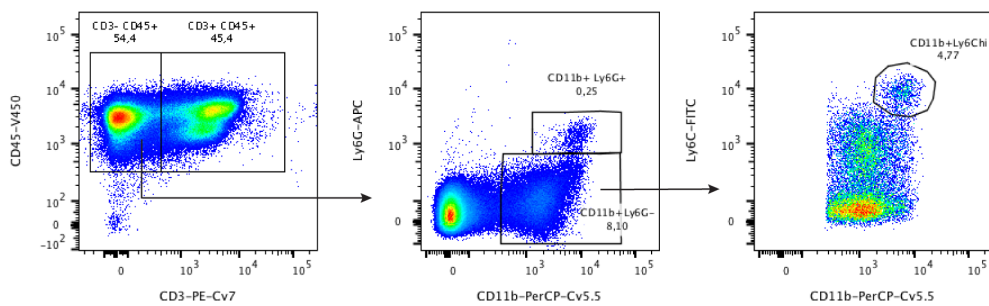

Supplement: EMS85060-supplement-Supplementary_Information.pdf [file EMS85060-supplement-Supplementary_Information.pdf]
